# Supplementary material
Source: PubMed Central journal article supplement (PMC4291241)
Supplement: supp_ddu473_ddu473supp.pdf [file supp_ddu473_ddu473supp.pdf]

Supplementary Material for

**Prioritizing Genes for X-Linked Diseases Using Population Exome Data**

Xiaoyan Ge,<sup>1,2</sup> Pui-Yan Kwok,<sup>2,3,4</sup> Joseph T.C. Shieh<sup>1,2\*</sup>

<sup>1</sup>Division of Medical Genetics, Department of Pediatrics

<sup>2</sup>Institute for Human Genetics

<sup>3</sup>Department of Dermatology and

<sup>4</sup>Cardiovascular Research Institute, University of California San Francisco, San Francisco, California, 94143, USA

\* Correspondence to:

Joseph Shieh, M.D., Ph.D.

Assistant Professor, Division of Medical Genetics, Department of Pediatrics

Institute for Human Genetics, University of California San Francisco

UCSF Benioff Children's Hospital

San Francisco, CA 94143-0793, USA

E-mail: [shiehj2@humgen.ucsf.edu](mailto:shiehj2@humgen.ucsf.edu)

**Figure S1:** Comparison of the non-synonymous ratio (dN) distribution and the synonymous ratio (dS) distribution.

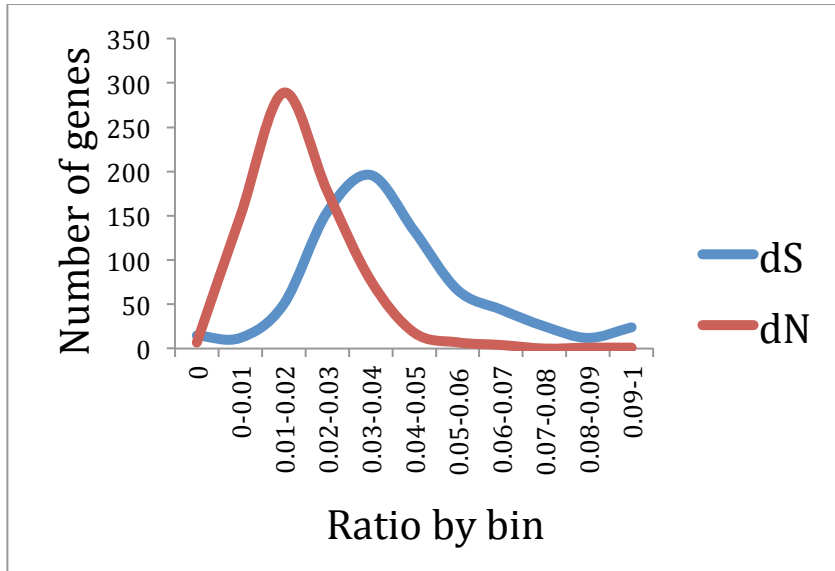

**Figure S2:** Genes with higher median CADD scores, higher median conservation scores (phyloP and phastCons) and higher network scores have lower dN/dS ratios. (A) dN/dS ratios for genes with high or low CADD scores. p-value=1.135e-15 (two-sample Wilcoxon test). (B) dN/dS ratios for genes with high or low combined network scores. p-value=1.188e-08 (two-sample Wilcoxon test). (C) dN/dS ratios for genes with high or low phyloP scores. p-value=7.041e-3 (two-sample Wilcoxon test). (D) dN/dS ratios for genes with high or low phastCons scores. p-value=7.131e-15 (two-sample Wilcoxon test).

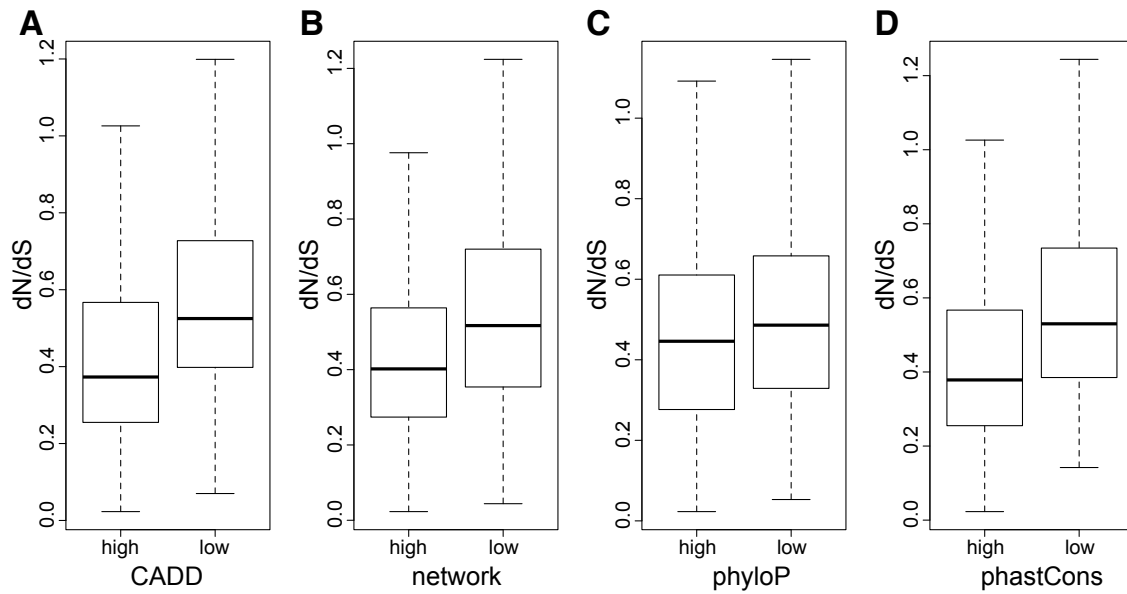

**Figure S3:** ROC curves of individual parameters used to predict OMIM disease genes. The dN/dS ratio and individual scores from network scoring are shown for X chromosome genes. The performance of dN/dS ratio is compared to the single scores included in the combined network score. AUC for the corresponding ROC curves are shown. See methods for details.

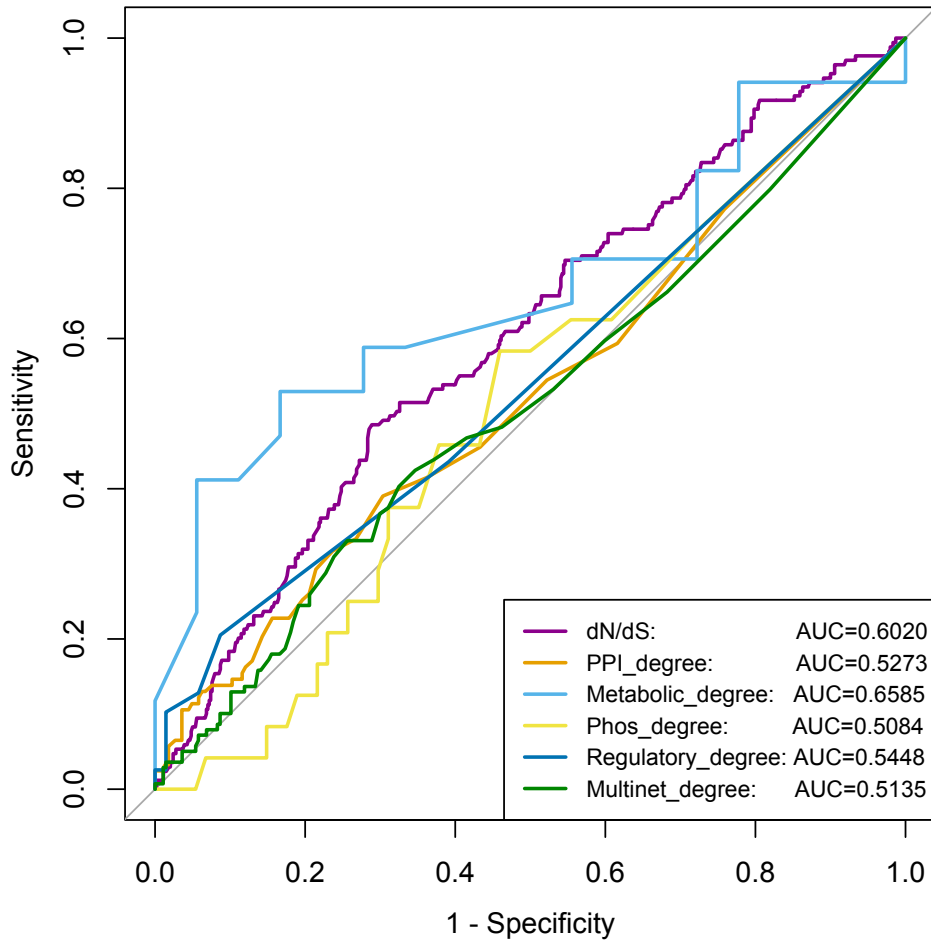

**Figure S4:** ROC curves of the dN/dS ratio, Median CADD scores, Median conservation scores, Network scores and the All combined scores, reflecting the capacity to predict the OMIM disease genes. Area under the curve (AUC) values are provided for each of the scores.

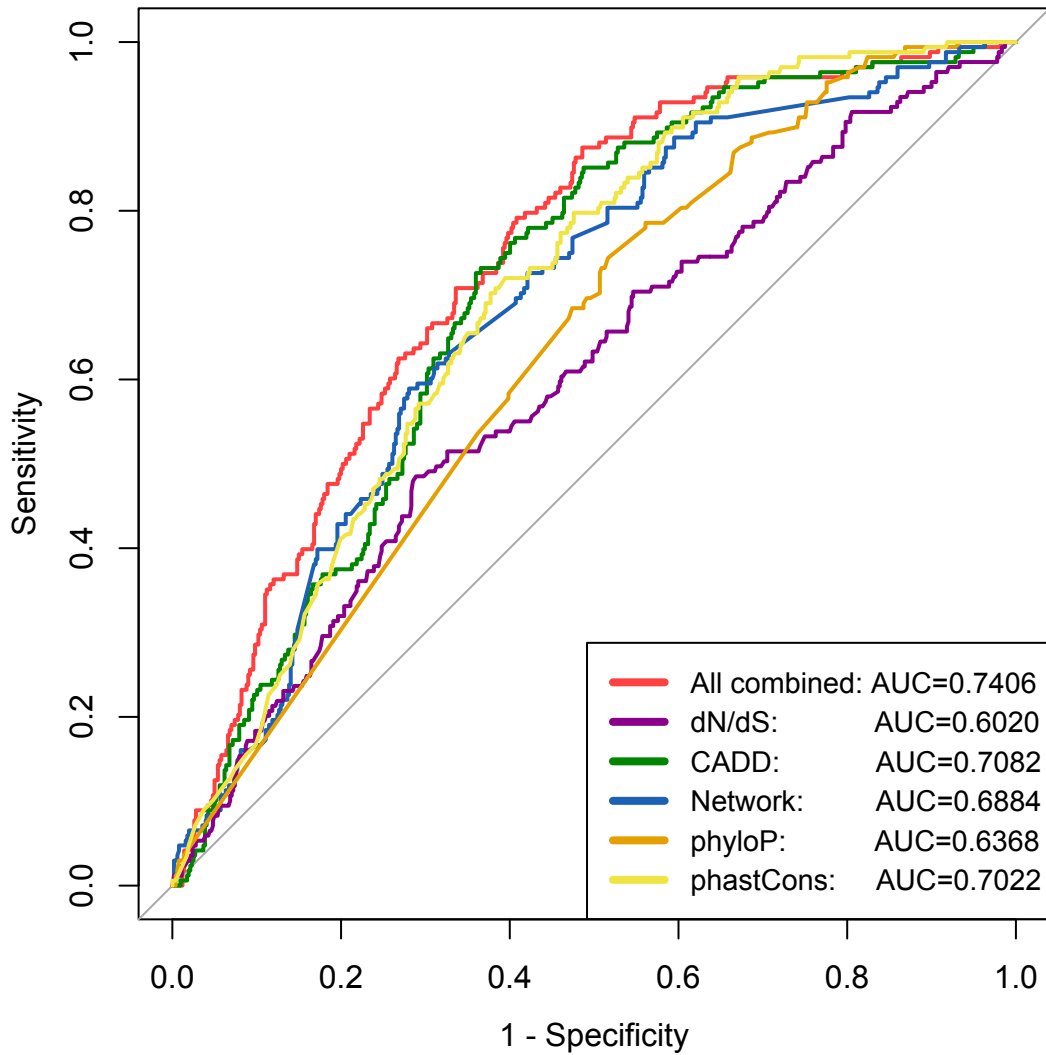

**Figure S5:** Comparison of All combined scores for OMIM disease genes (OMIM) or genes not yet annotated in OMIM disease database (non-OMIM). OMIM-disease genes have significantly higher All combined scores compared to non-OMIM genes.  $p\text{-value} < 2.2e-16$  (two-sample Wilcoxon test).

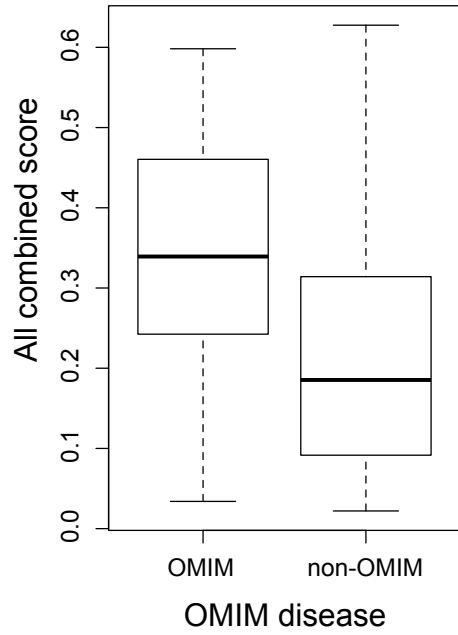

**Figure S6:** Comparison of dN/dS ratio for African-American and European-American populations in OMIM disease genes (OMIM) or genes not yet annotated in OMIM disease database (non-OMIM). (A) dN/dS ratio for European-American (dN/dS<sub>EA</sub>) is lower for OMIM-disease genes compared to non-OMIM genes. p-value=3.12e-02 (two-sample Wilcoxon test). (B) dN/dS ratio for African-American (dN/dS<sub>AA</sub>) is lower for OMIM-disease genes compared to non-OMIM genes. p-value=4.65e-05 (two-sample Wilcoxon test).

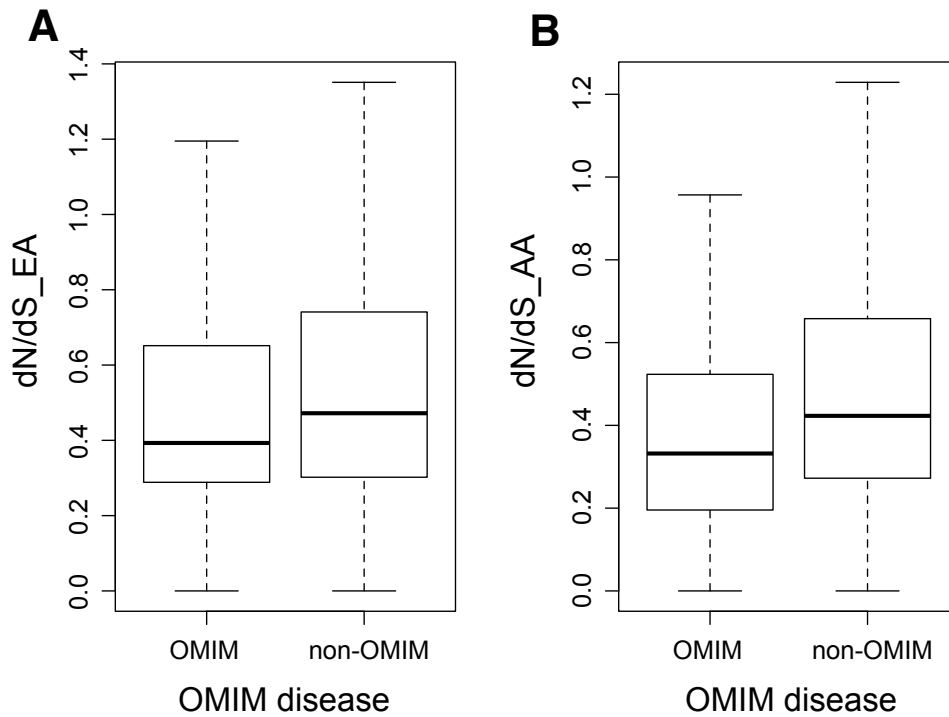

**Figure S7:** dN/dS ratio for genes with different coding sequence length by scatterplot. Inset: Boxplot of dN/dS ratio for different coding sequence lengths. X-axis is the coding sequence length. Y-axis is the dN/dS ratio. Median dN/dS ratio does not change significantly with coding sequence length, while more variation is observed in smaller genes (e.g. genes with coding sequence length less than 500bp).

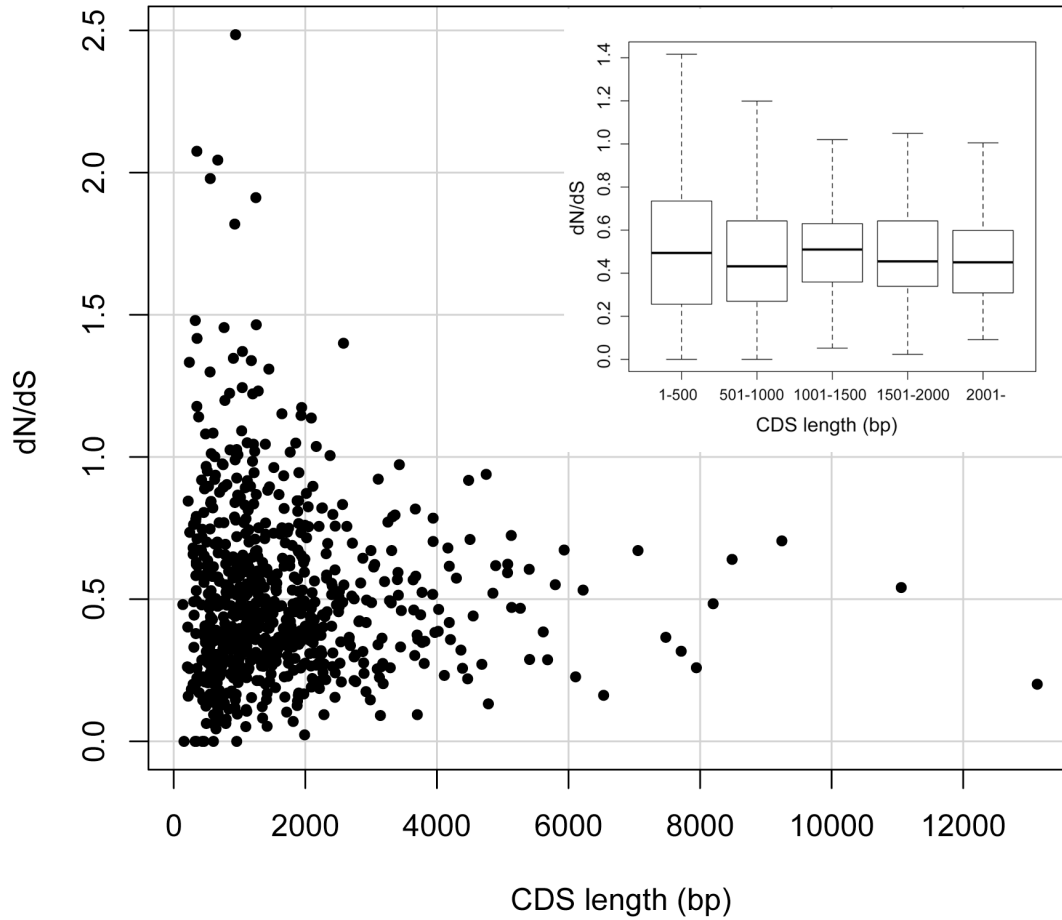



**Figure S8:** Variant distribution patterns in genes without annotated pathogenic variants. From top to bottom: Top: Variant site density plots for synonymous and nonsynonymous variants along the coding sequence demonstrate six genes with localized missense depletion or occurrence. X-axis shows the relative position of the synonymous and nonsynonymous variants in the coding sequence; the y-axis reflects the number of variants. Green: synonymous. Red: nonsynonymous. Bottom: Domain structures: dark grey rectangles show the protein domains and light grey bars show the whole protein. *HDAC6*: NM\_006044; *RPGR*: NM\_001034853; *TRPC5*: NM\_012471; *UPF3B*: NM\_080632; *USP51*: NM\_201286; *VAMP7*: NM\_001185183;

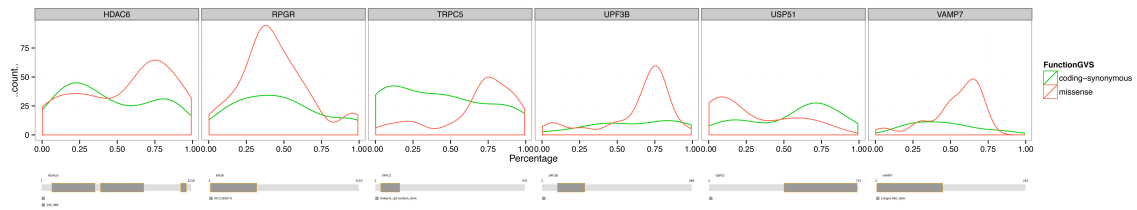

**Figure S9:** Relative position of stop-gain variants in X-chromosome OMIM gene coding sequence. X axis represents the relative position along coding sequence (e.g. 0.1 is 10% of the coding sequence). Y axis represents the number of genes.

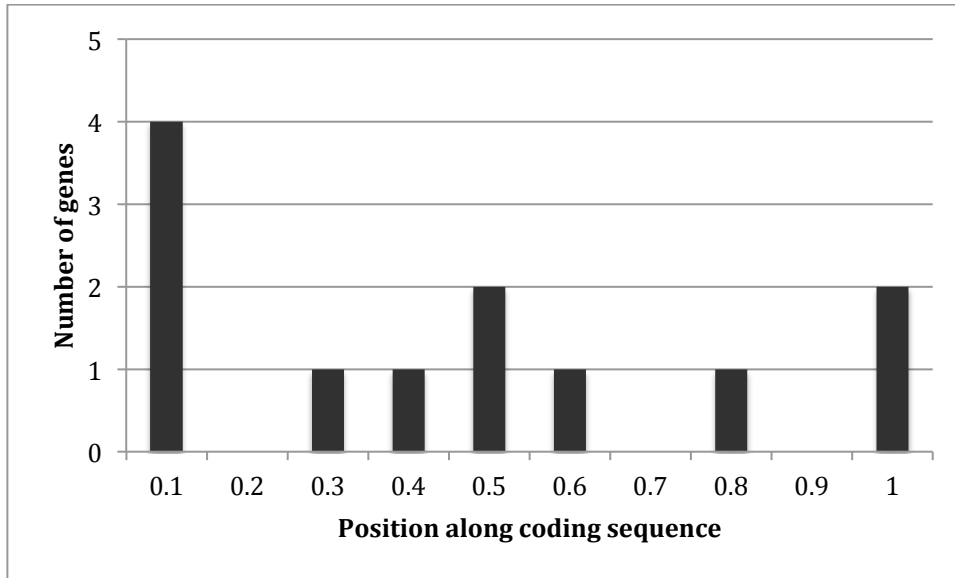

**Table S1: Variant diversity for each chromosome.**

| Chromosome           | 1     | 2     | 3     | 4     | 5     | 6     | 7     | 8     | 9     | 10    | 11    | 12    | 13    | 14    | 15    | 16    | 17    | 18    | 19    | 20    | 21    | 22    | X     | Y     |
|----------------------|-------|-------|-------|-------|-------|-------|-------|-------|-------|-------|-------|-------|-------|-------|-------|-------|-------|-------|-------|-------|-------|-------|-------|-------|
| stop_gained          | 1771  | 1081  | 970   | 667   | 716   | 823   | 700   | 564   | 605   | 598   | 1042  | 857   | 246   | 452   | 519   | 683   | 965   | 241   | 1306  | 358   | 160   | 313   | 233   | 4     |
| stop_lost            | 57    | 27    | 29    | 27    | 24    | 32    | 23    | 19    | 25    | 41    | 26    | 4     | 10    | 19    | 19    | 28    | 3     | 43    | 15    | 7     | 11    | 10    | 0     | 0     |
| splice_3             | 355   | 268   | 224   | 158   | 135   | 205   | 154   | 140   | 142   | 144   | 243   | 213   | 72    | 107   | 106   | 169   | 233   | 58    | 217   | 109   | 35    | 59    | 56    | 0     |
| splice_5             | 490   | 299   | 283   | 187   | 160   | 233   | 217   | 185   | 161   | 180   | 270   | 285   | 76    | 124   | 147   | 197   | 271   | 54    | 279   | 116   | 40    | 103   | 62    | 2     |
| frameshift           | 2337  | 1459  | 1292  | 889   | 961   | 1113  | 1074  | 732   | 925   | 777   | 1424  | 1143  | 420   | 677   | 708   | 887   | 1372  | 289   | 1934  | 500   | 220   | 471   | 380   | 2     |
| missense             | 70833 | 48760 | 39807 | 27393 | 31893 | 34704 | 30989 | 24674 | 29156 | 26536 | 44310 | 34637 | 11628 | 21982 | 23636 | 31788 | 40124 | 10452 | 49045 | 17859 | 7918  | 15421 | 16624 | 147   |
| coding_synonymous    | 41568 | 28736 | 23432 | 15555 | 19056 | 20173 | 19258 | 14938 | 18363 | 15935 | 25834 | 21228 | 7161  | 13150 | 13951 | 20722 | 25600 | 6528  | 31951 | 11690 | 5190  | 10427 | 11186 | 71    |
| coding_other         | 1184  | 820   | 656   | 540   | 533   | 668   | 1254  | 401   | 471   | 437   | 699   | 660   | 235   | 377   | 395   | 649   | 761   | 170   | 1020  | 322   | 156   | 290   | 510   | 2     |
| utr_3                | 4717  | 2653  | 2302  | 1532  | 2269  | 2218  | 2117  | 1370  | 1792  | 1521  | 2430  | 2356  | 689   | 1305  | 1273  | 2459  | 3106  | 619   | 3398  | 1279  | 608   | 1325  | 1113  | 5     |
| utr_5                | 3003  | 1832  | 1597  | 1057  | 1204  | 1711  | 1286  | 1020  | 1061  | 1046  | 1839  | 1501  | 538   | 894   | 779   | 1174  | 1693  | 355   | 2164  | 743   | 277   | 630   | 821   | 5     |
| intron               | 71115 | 54500 | 42209 | 26428 | 64873 | 33604 | 34609 | 25470 | 31718 | 29348 | 39536 | 38413 | 12697 | 21165 | 24162 | 33864 | 44520 | 10613 | 46689 | 19661 | 9876  | 17214 | 17683 | 139   |
| total_protein_coding | 1E+05 | 81450 | 66693 | 45416 | 53478 | 57951 | 53669 | 41657 | 49842 | 44632 | 73863 | 59049 | 19842 | 36879 | 39481 | 55114 | 69354 | 17795 | 85795 | 30969 | 13726 | 27095 | 29061 | 228   |
| LOF                  | 5010  | 3134  | 2798  | 1928  | 1996  | 2406  | 2168  | 1644  | 1852  | 1724  | 3020  | 2524  | 818   | 1370  | 1499  | 1955  | 2869  | 645   | 3779  | 1098  | 462   | 957   | 741   | 8     |
| bps                  | 3E+06 | 2E+06 | 2E+06 | 1E+06 | 2E+06 | 2E+06 | 2E+06 | 1E+06 | 1E+06 | 1E+06 | 2E+06 | 2E+06 | 6E+05 | 1E+06 | 1E+06 | 1E+06 | 2E+06 | 5E+05 | 2E+06 | 8E+05 | 3E+05 | 7E+05 | 1E+06 | 36858 |
| No.genes             | 1925  | 1177  | 1028  | 707   | 825   | 988   | 848   | 625   | 738   | 698   | 1220  | 983   | 298   | 569   | 538   | 767   | 1095  | 256   | 1321  | 516   | 211   | 415   | 737   | 18    |
| mis_by_syn           | 1.704 | 1.697 | 1.699 | 1.761 | 1.674 | 1.72  | 1.609 | 1.652 | 1.588 | 1.665 | 1.715 | 1.632 | 1.624 | 1.672 | 1.694 | 1.534 | 1.567 | 1.601 | 1.535 | 1.528 | 1.526 | 1.479 | 1.486 | 2.07  |
| LOF_by_syn           | 0.121 | 0.109 | 0.119 | 0.124 | 0.105 | 0.119 | 0.113 | 0.11  | 0.101 | 0.108 | 0.117 | 0.119 | 0.114 | 0.104 | 0.107 | 0.094 | 0.112 | 0.099 | 0.118 | 0.094 | 0.089 | 0.092 | 0.066 | 0.113 |

**Table S2:** dN/dS ratios for X-chromosome genes, calculated using non-synonymous (N) and synonymous (S) variants in ESP.  
See attached file Supplementary Table 2.xlsx

**Table S3:** High-confidence loss of function variants in males, females and by racial/ethnic group (European American and African American).

|                 | LOF Total | frameshift | splice-3 | splice-5 | stop-gain | stop-lost |
|-----------------|-----------|------------|----------|----------|-----------|-----------|
| Female specific | 36        | 6          | 8        | 9        | 12        | 1         |
| Male specific   | 15        | 6          | 3        | 3        | 3         | 0         |
| EA specific     | 36        | 13         | 6        | 7        | 10        | 0         |
| AA specific     | 18        | 2          | 5        | 5        | 5         | 1         |

**Table S4:** OMIM disease genes on X chromosome that are deleted in at least one structural variant in healthy control samples.

|                                 | Total Gene Number | Number of genes with complete DGV deletion | Percentage |
|---------------------------------|-------------------|--------------------------------------------|------------|
| Total OMIM genes                | 174               | 71                                         | 40.8%      |
| OMIM genes with LoF variants    | 57                | 27                                         | 47.4%      |
| OMIM genes without LoF variants | 117               | 44                                         | 37.6%      |

**Table S5:** Enriched pathways for X-chromosome OMIM disease genes compared to all X chromosome genes

| KEGG Pathway                   | Number of Genes | Gene List                                                                                                                                 | Adjusted P-value* |
|--------------------------------|-----------------|-------------------------------------------------------------------------------------------------------------------------------------------|-------------------|
| Metabolic pathways             | 20              | <i>PDHAI, GK, OTC, NSDHL, SAT1, HSD17B10, C1GALT1C1, ALAS2, EBP, IDS, HPRT1, PGK1, ALG13, OCRL, NDUFA1, MAOA, ACSL4, PIGA, PRPS1, SMS</i> | 9.45E-05          |
| Small cell lung cancer         | 4               | <i>COL4A5, IKBKG, COL4A6, XIAP</i>                                                                                                        | 0.0325            |
| Ubiquitin mediated proteolysis | 6               | <i>UBA1, HUWE1, MID1, CUL4B, UBE2A, XIAP</i>                                                                                              | 0.0325            |
| Primary immunodeficiency       | 4               | <i>IKBKG, CD40LG, IL2RG, BTK</i>                                                                                                          | 0.0325            |

\*Benjamini-Hochberg
